# Supplementary material
Source: ML conference proceedings conference paper supplement (https://openaccess.thecvf.com/content/ICCV2023/html/Lin_VI-Net_Boosting_Category-level_ICCV_2023_paper.html)
Supplement: Supplementary file 1 [file Lin_VI-Net_Boosting_Category-level_ICCV_2023_supplemental.pdf]

# Supplementary Materials for “VI-Net: Boosting Category-level 6D Object Pose Estimation via Learning Decoupled Rotations on the Spherical Representations”

## A. Network Specifies

For the estimation of translation and size, we employ the PointNet++ [1] with mulit-scale grouping to extract hierarchical features for making point-wise predictions, which are averaged as the final results; the network specifies are given in Fig. 1(a). Please refer to [1] for more details.

For the estimation of rotation, we desgin VI-Net with three main modules, including Spherical FPN, V-Branch and I-Branch, whose network specifies are all given in Fig. 1(b).

## B. Implementation of SPA-SConv

To conduct continuous convolutions on the sphere, we introduce the design of Spatial Spherical Convolution (SPA-SConv) in Sec. 4.3, and also include the whole process of SPA-SConv in Algorithm 1.

---

### Algorithm 1 Spatial Spherical Convolution.

---

**Input:** spherical feature  $\mathcal{S}_l \in \mathbb{R}^{B \times C_l \times H_l \times W_l}$ , kernel size  $K$ , stride  $s$ , and output feature channel  $C_{l+1}$ , with batch size  $B$ , input feature channel  $C_l$ , resolution  $H_l \times W_l$ .

**Output:** spherical feature  $\mathcal{S}_{l+1} \in \mathbb{R}^{B \times C_{l+1} \times H_{l+1} \times W_{l+1}}$ , with resolution  $H_{l+1} \times W_{l+1}$ .

```

1:  $P = K // 2$ 
2: Initialize  $\mathcal{S}_l^{pad} \in \mathbb{R}^{B \times C_l \times (H_l + 2P) \times (W_l + 2P)}$ 
3: for  $h = 1$  to  $H_l$  do
4:   for  $w = 1$  to  $W_l$  do
5:      $\mathcal{S}_l^{pad}[:, :, h + P, w + P] = \mathcal{S}_l[:, :, h, w]$ 
6: for  $p = 1$  to  $P$  do
7:   for  $w = 1$  to  $W_l$  do
8:     if  $w \leq W_l / 2$  then
9:        $\mathcal{S}_l^{pad}[:, :, p, w + P] = \mathcal{S}_l^{pad}[:, :, 2P - p + 1, w + W_l / 2 + P]$ 
10:       $\mathcal{S}_l^{pad}[:, :, H_l + P + p, w + P] = \mathcal{S}_l^{pad}[:, :, H_l + P - p + 1, w + W_l / 2 + P]$ 
11:     else
12:        $\mathcal{S}_l^{pad}[:, :, p, w + P] = \mathcal{S}_l^{pad}[:, :, 2P - p + 1, w - W_l / 2 + P]$ 
13:        $\mathcal{S}_l^{pad}[:, :, H_l + P + p, w + P] = \mathcal{S}_l^{pad}[:, :, H_l + P - p + 1, w - W_l / 2 + P]$ 
14: for  $p = 1$  to  $P$  do
15:   for  $h = 1$  to  $H_l + 2P$  do
16:      $\mathcal{S}_l^{pad}[:, :, h, p] = \mathcal{S}_l^{pad}[:, :, h, W_l + p]$ 
17:      $\mathcal{S}_l^{pad}[:, :, h, W_l + P + p] = \mathcal{S}_l^{pad}[:, :, h, P + p]$ 
18: Initialize the 2D convolution  $\text{Conv}$  with the kernel weight  $\kappa_l \in \mathbb{R}^{C_{l+1} \times C_l \times K \times K}$  and stride  $s$ 
19:  $\mathcal{S}_{l+1,1} = \text{Conv}(\mathcal{S}_l^{pad}; \kappa_l)$ 
20:  $\mathcal{S}_{l+1,2} = \text{Conv}(\mathcal{S}_l^{pad}; \text{Flip}(\kappa_l))$    % Flip denotes horizontal flip
21:  $\mathcal{S}_{l+1} = \text{Max}(\mathcal{S}_{l+1,1}, \mathcal{S}_{l+1,2})$    % Max denotes element-wise max-pooling
22: return  $\mathcal{S}_{l+1}$ 

```

---

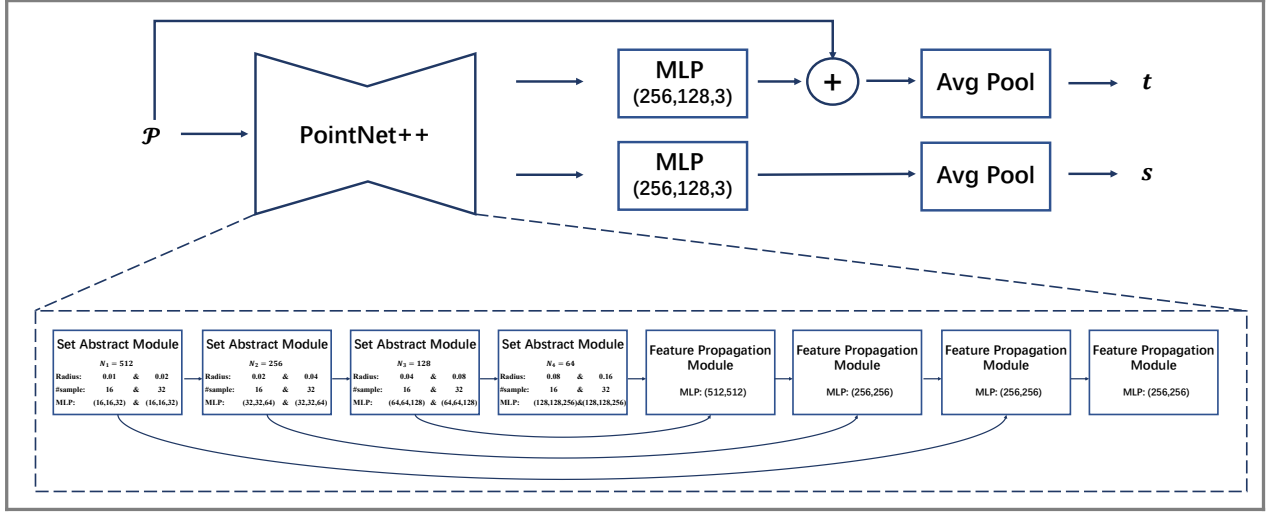

(a)

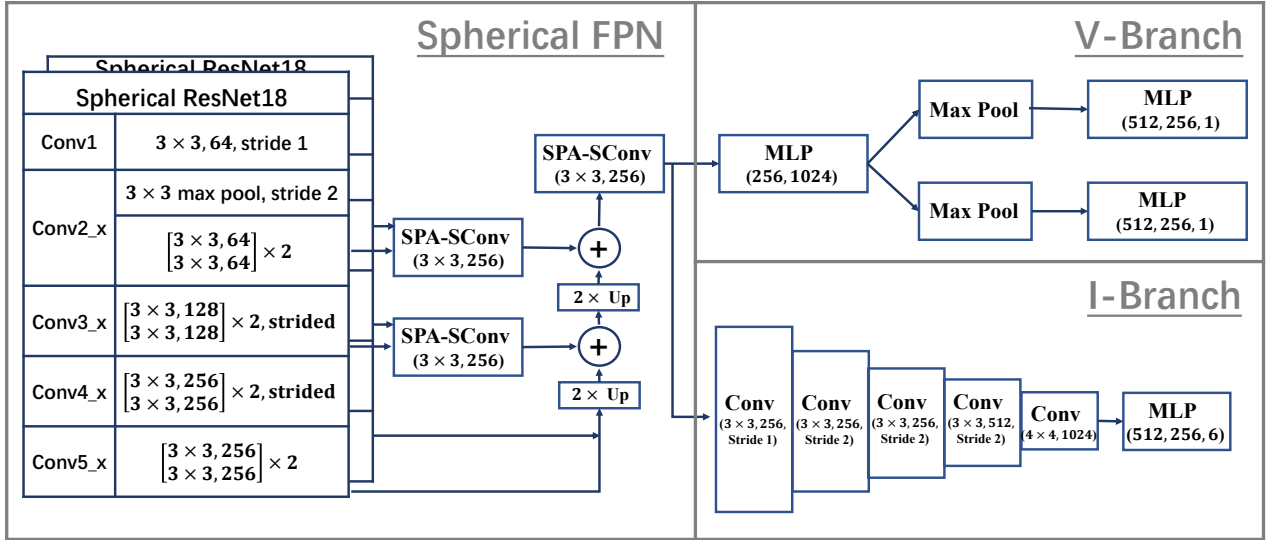

(b)

Figure 1. Network Specifies of (a) Pointnet++ for translation / size estimation and (b) our proposed VI-Net for rotation estimation.

### C. Proof: SPA-SConv is Viewpoint-equivariant

We define the SPATial Spherical Convolutions (SPA-SConv) as follows:

$$\begin{aligned}
 \mathcal{S}_{l+1} &= f(\mathcal{S}_l; \kappa_l) \\
 &= \text{Max}(\text{Conv}(\mathcal{S}_l^{\text{pad}}; \kappa_l), \text{Conv}(\mathcal{S}_l^{\text{pad}}; \text{Flip}(\kappa_l))),
 \end{aligned} \tag{1}$$

where

$$\text{Conv}(\mathcal{S}_l(h, w); \kappa_l) = \sum_i \sum_j \kappa_l(i, j) \mathcal{S}_l(h + i, w + j), \tag{2}$$

$$\text{Conv}(\mathcal{S}_l(h, w); \text{Flip}(\kappa_l)) = \sum_i \sum_j \kappa_l(i, j) \mathcal{S}_l(h - i, w + j), \tag{3}$$

with  $i \in \{K//2 - K, \dots, 0, \dots, K//2\}$  and  $j \in \{K//2 - K, \dots, 0, \dots, K//2\}$ .  $\kappa_l$  denoting the weight of the convolution and  $K$  is the kernel size.  $\text{Conv}$ ,  $\text{Flip}$ , and  $\text{Max}$  denotes the 2D convolutional operation, horizontal flip, and element-wise max-pooling, respectively. Given the viewpoint rotation  $\mathbf{R}_{vp} = \mathbf{R}_Z(\varphi)\mathbf{R}_Y(\theta)$ , we claim that SPA-SConv is viewpoint-equivariant, that is,

$$\mathcal{T}\mathcal{S}_{l+1} = \mathcal{T}f(\mathcal{S}_l; \kappa_l) = f(\mathcal{T}\mathcal{S}_l; \kappa_l), \quad (4)$$

where  $\mathcal{T}$  denotes the transformation w.r.t  $\mathbf{R}_{vp}$  on the spherical features. In the following, we will prove the property of viewpoint-equivariance of SPA-SConv. For simplicity,  $\mathcal{S}_{l+1}$  and  $\mathcal{S}_l$  are assumed to share the same spatial sizes  $H_l \times W_l$ .

Firstly, considering  $\mathbf{R}_{vp} = \mathbf{R}_Z(\varphi)$  with the feature transformation  $\mathcal{T}_\varphi$ , we have

$$\mathcal{T}_\varphi\mathcal{S}_l(h, w) = \begin{cases} \mathcal{S}_l(h, w - \Delta w + 1), & \text{if C1: } \Delta w \leq w \\ \mathcal{S}_l(h, w - \Delta w + 1 + W_l), & \text{if C2: } \Delta w > w \end{cases}, \quad (5)$$

where  $\Delta w = \lfloor \varphi/W_l \cdot 2\pi \rfloor$ , such that

$$\begin{aligned} & \mathcal{T}_\varphi\mathcal{S}_{l+1}(h, w) \\ = & \begin{cases} \mathcal{S}_{l+1}(h, w - \Delta w + 1), & \text{if C1} \\ \mathcal{S}_{l+1}(h, w - \Delta w + 1 + W_l), & \text{if C2} \end{cases} \\ = & \begin{cases} f(\mathcal{S}_l(h, w - \Delta w + 1); \kappa_l), & \text{if C1} \\ f(\mathcal{S}_l(h, w - \Delta w + 1 + W_l); \kappa_l), & \text{if C2} \end{cases} \\ = & \begin{cases} \text{Max}(\text{Conv}(\mathcal{S}_l(h, w - \Delta w + 1); \kappa_l), \text{Conv}(\mathcal{S}_l(h, w - \Delta w + 1); \text{Flip}(\kappa_l))), & \text{if C1} \\ \text{Max}(\text{Conv}(\mathcal{S}_l(h, w - \Delta w + 1 + W_l); \kappa_l), \text{Conv}(\mathcal{S}_l(h, w - \Delta w + 1 + W_l); \text{Flip}(\kappa_l))), & \text{if C2} \end{cases} \\ = & \begin{cases} \text{Max}(\sum_i \sum_j \kappa_l(i, j)\mathcal{S}_l(h + i, w - \Delta w + 1 + j), \sum_i \sum_j \kappa_l(i, j)\mathcal{S}_l(h - i, w - \Delta w + 1 + j)), & \text{if C1} \\ \text{Max}(\sum_i \sum_j \kappa_l(i, j)\mathcal{S}_l(h + i, w - \Delta w + 1 + W_l + j), \sum_i \sum_j \kappa_l(i, j)\mathcal{S}_l(h - i, w - \Delta w + 1 + W_l + j)), & \text{if C2} \end{cases} \\ = & \text{Max}(\sum_i \sum_j \kappa_l(i, j)\mathcal{T}_\varphi\mathcal{S}_l(h + i, w + j), \sum_i \sum_j \kappa_l(i, j)\mathcal{T}_\varphi\mathcal{S}_l(h - i, w + j)) \\ = & \text{Max}(\text{Conv}(\mathcal{T}_\varphi\mathcal{S}_l(h, w); \kappa_l), \text{Conv}(\mathcal{T}_\varphi\mathcal{S}_l(h, w); \text{Flip}(\kappa_l))) \\ = & f(\mathcal{T}_\varphi\mathcal{S}_l(h, w); \kappa_l). \end{aligned} \quad (6)$$

Next, considering  $\mathbf{R}_{vp} = \mathbf{R}_Y(\theta)$  with the feature transformation  $\mathcal{T}_\theta$ , we have

$$\mathcal{T}_\theta\mathcal{S}_l(h, w) = \begin{cases} \mathcal{S}_l(h - \Delta h + 1, w), & \text{if C3: } w \leq W_l//2, \Delta h \leq h \\ \mathcal{S}_l(\Delta h - h, w + W_l//2), & \text{if C4: } w \leq W_l//2, \Delta h > h \\ \mathcal{S}_l(h + \Delta h, w), & \text{if C5: } w > W_l//2, \Delta h \leq H_l - h \\ \mathcal{S}_l(2H_l - (h + \Delta h) + 1, w - W_l//2), & \text{if C6: } w > W_l//2, \Delta h > H_l - h \end{cases}, \quad (7)$$

where  $\Delta h = \lfloor \theta/H_l \cdot \pi \rfloor$ , such that

$$\begin{aligned}
& \mathcal{T}_\theta \mathcal{S}_{l+1}(h, w) \\
= & \begin{cases} \mathcal{S}_{l+1}(h - \Delta h + 1, w), & \text{if C3} \\ \mathcal{S}_{l+1}(\Delta h - h, w + W_l/2), & \text{if C4} \\ \mathcal{S}_{l+1}(h + \Delta h, w), & \text{if C5} \\ \mathcal{S}_{l+1}(2H_l - (h + \Delta h) + 1, w - W_l/2), & \text{if C6} \end{cases} \\
= & \begin{cases} \text{Max}(\text{Conv}(\mathcal{S}_l(h - \Delta h + 1, w); \kappa_l), \text{Conv}(\mathcal{S}_l(h - \Delta h + 1, w); \text{Flip}(\kappa_l))), & \text{if C3} \\ \text{Max}(\text{Conv}(\mathcal{S}_l(\Delta h - h, w + W_l/2); \kappa_l), \text{Conv}(\mathcal{S}_l(\Delta h - h, w + W_l/2); \text{Flip}(\kappa_l))), & \text{if C4} \\ \text{Max}(\text{Conv}(\mathcal{S}_l(h + \Delta h, w); \kappa_l), \text{Conv}(\mathcal{S}_l(h + \Delta h, w); \text{Flip}(\kappa_l))), & \text{if C5} \\ \text{Max}(\text{Conv}(\mathcal{S}_l(2H_l - (h + \Delta h) + 1, w - W_l/2); \kappa_l), \text{Conv}(\mathcal{S}_l(2H_l - (h + \Delta h) + 1, w - W_l/2); \text{Flip}(\kappa_l))), & \text{if C6} \end{cases} \\
= & \begin{cases} \text{Max}(\sum_i \sum_j \kappa_l(i, j) \mathcal{S}_l(h - \Delta h + 1 + i, w + j), \sum_i \sum_j \kappa_l(i, j) \mathcal{S}_l(h - \Delta h + 1 - i, w + j)), & \text{if C3} \\ \text{Max}(\sum_i \sum_j \kappa_l(i, j) \mathcal{S}_l(\Delta h - h + i, w + W_l/2 + j), \sum_i \sum_j \kappa_l(i, j) \mathcal{S}_l(\Delta h - h - i, w + W_l/2 + j)), & \text{if C4} \\ \text{Max}(\sum_i \sum_j \kappa_l(i, j) \mathcal{S}_l(h + \Delta h + i, w + j), \sum_i \sum_j \kappa_l(i, j) \mathcal{S}_l(h + \Delta h - i, w + j)), & \text{if C5} \\ \text{Max}(\sum_i \sum_j \kappa_l(i, j) \mathcal{S}_l(2H_l - (h + \Delta h) + 1 + i, w - W_l/2 + j), \sum_i \sum_j \kappa_l(i, j) \mathcal{S}_l(2H_l - (h + \Delta h) + 1 - i, w - W_l/2 + j)), & \text{if C6} \end{cases} \\
= & \begin{cases} \text{Max}(\sum_i \sum_j \kappa_l(i, j) \mathcal{T}_\theta \mathcal{S}_l(h + i, w + j), \sum_i \sum_j \kappa_l(i, j) \mathcal{T}_\theta \mathcal{S}_l(h - i, w + j)), & \text{if C3} \\ \text{Max}(\sum_i \sum_j \kappa_l(i, j) \mathcal{T}_\theta \mathcal{S}_l(h - i, w + j), \sum_i \sum_j \kappa_l(i, j) \mathcal{T}_\theta \mathcal{S}_l(h + i, w + j)), & \text{if C4} \\ \text{Max}(\sum_i \sum_j \kappa_l(i, j) \mathcal{T}_\theta \mathcal{S}_l(h + i, w + j), \sum_i \sum_j \kappa_l(i, j) \mathcal{T}_\theta \mathcal{S}_l(h - i, w + j)), & \text{if C5} \\ \text{Max}(\sum_i \sum_j \kappa_l(i, j) \mathcal{T}_\theta \mathcal{S}_l(h - i, w + j), \sum_i \sum_j \kappa_l(i, j) \mathcal{T}_\theta \mathcal{S}_l(h + i, w + j)), & \text{if C6} \end{cases} \\
= & \text{Max}(\sum_i \sum_j \kappa_l(i, j) \mathcal{T}_\theta \mathcal{S}_l(h + i, w + j), \sum_i \sum_j \kappa_l(i, j) \mathcal{T}_\theta \mathcal{S}_l(h - i, w + j)) \\
= & \text{Max}(\text{Conv}(\mathcal{T}_\theta \mathcal{S}_l(h, w); \kappa_l), \text{Conv}(\mathcal{T}_\theta \mathcal{S}_l(h, w); \text{Flip}(\kappa_l))) \\
= & f(\mathcal{T}_\theta \mathcal{S}_l(h, w); \kappa_l). \tag{8}
\end{aligned}$$

Finally, for the general case of  $\mathcal{T} = \mathcal{T}_\varphi \mathcal{T}_\theta$ , we prove that

$$\mathcal{T} \mathcal{S}_{l+1} = \mathcal{T}_\varphi \mathcal{T}_\theta \mathcal{S}_{l+1} = \mathcal{T}_\varphi(\mathcal{T}_\theta \mathcal{S}_{l+1}) = \mathcal{T}_\varphi f(\mathcal{T}_\theta \mathcal{S}_l; \kappa_l) = f(\mathcal{T}_\varphi \mathcal{T}_\theta \mathcal{S}_l; \kappa_l) = f(\mathcal{T} \mathcal{S}_l; \kappa_l). \tag{9}$$

## References

- [1] Charles Ruizhongtai Qi, Li Yi, Hao Su, and Leonidas J Guibas. Pointnet++: Deep hierarchical feature learning on point sets in a metric space. *Advances in neural information processing systems*, 30, 2017.
